# Supplementary material for: Ultraviolet-C Light and Peracetic Acid Extend the Shelf Life of Fresh and Frozen Strawberries
Source: MDPI journal article supplement (doi:10.3390/horticulturae10050452), 2024-04-29
Supplement: s1 [file s1]

## Supplementary material

**Table S1.** Total aerobic mesophylls (TAM) and yeasts and molds (Y&M) counts (log CFU g<sup>-1</sup>) in frozen strawberries. Values are the mean of 3 repetitions  $\pm$  standard deviation. Different lowercase letters show statistically significant differences ( $p < 0.05$ ) between gas compositions in the same day, and capital letters show statistically significant differences ( $p < 0.05$ ) during time within the same treatment analyzed with Tukey's test. Underlined values show statistically significant differences ( $p < 0.05$ ) between the three steps (initial, after WUVPA, and frozen-thawed at M0), analyzed with Tukey's test.

|                            | Packaging        | Initial       | After WUVPA <sup>1</sup> | M0                                            | M3                          | M6                          | M12                         |
|----------------------------|------------------|---------------|--------------------------|-----------------------------------------------|-----------------------------|-----------------------------|-----------------------------|
| TAM                        | MAP <sup>2</sup> | 2.5 $\pm$ 0.1 | 2.1 $\pm$ 0.3            | <u>1.2 <math>\pm</math> 0.3</u> <sup>aA</sup> | 1.2 $\pm$ 0.2 <sup>aA</sup> | 1.2 $\pm$ 0.3 <sup>aA</sup> | 1.4 $\pm$ 0.4 <sup>aA</sup> |
| (log CFU g <sup>-1</sup> ) | Air              |               |                          | <u>1.5 <math>\pm</math> 0.3</u> <sup>aA</sup> | 1.4 $\pm$ 0.2 <sup>aA</sup> | 1.2 $\pm$ 0.4 <sup>aA</sup> | 1.1 $\pm$ 0.2 <sup>aA</sup> |
| Y&M                        | MAP <sup>2</sup> | 2.5 $\pm$ 0.2 | 1.8 $\pm$ 0.2            | <u>1.4 <math>\pm</math> 0.2</u> <sup>aA</sup> | 1.4 $\pm$ 0.1 <sup>aA</sup> | 1.4 $\pm$ 0.2 <sup>aA</sup> | 1.3 $\pm$ 0.1 <sup>aA</sup> |
| (log CFU g <sup>-1</sup> ) | Air              |               |                          | <u>1.6 <math>\pm</math> 0.3</u> <sup>aA</sup> | 1.4 $\pm$ 0.1 <sup>aA</sup> | 1.5 $\pm$ 0.3 <sup>aA</sup> | 1.3 $\pm$ 0.1 <sup>aA</sup> |

<sup>1</sup> WUVPA, water-assisted ultraviolet-C light combined with peracetic acid at 40 mg L<sup>-1</sup>. <sup>2</sup> MAP, modified atmosphere packaging.

**Table S2.** Graphical representation of the strawberries (whole and fresh-cut) after the respective treatment over the days.

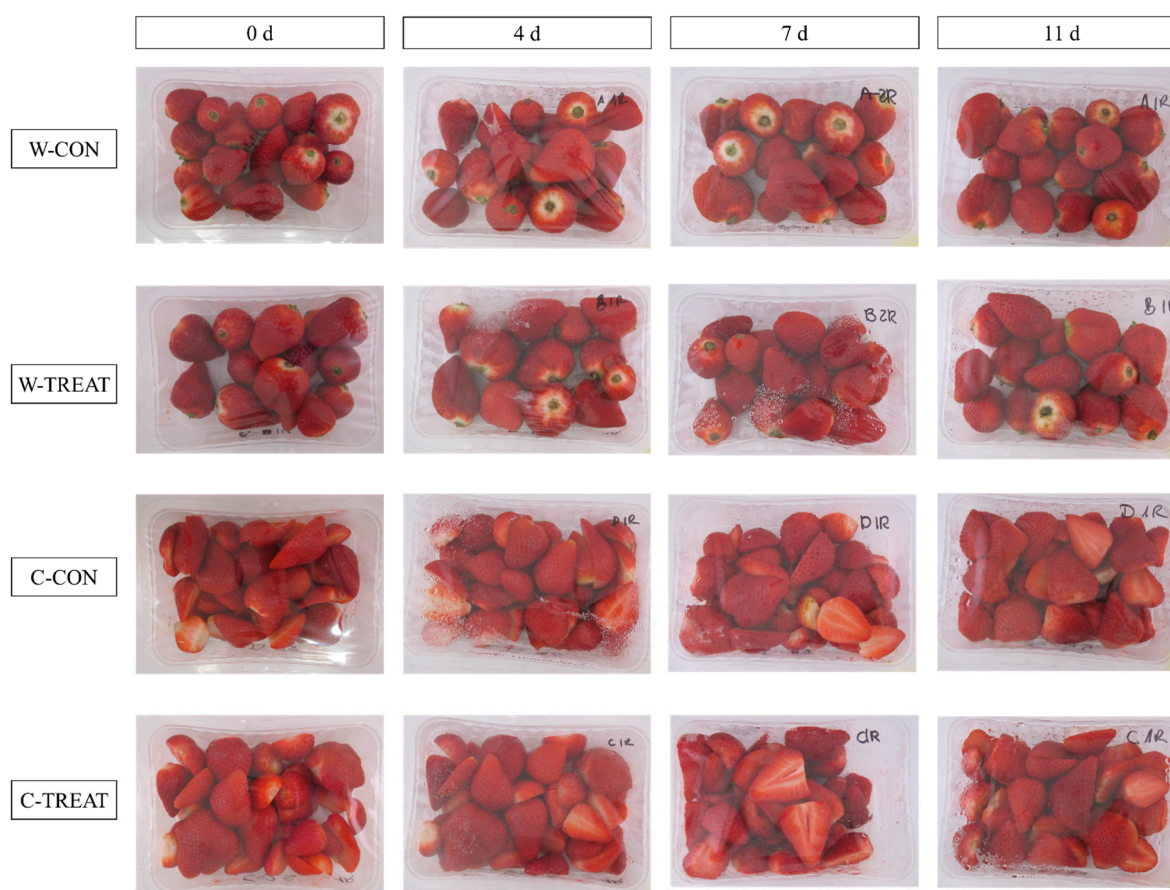

**Table S3.** Graphical representation of the strawberries (frozen) after their respective treatment.

|               | Air                                                                                                                                                                        | MAP                                                                                                                                                                            |
|---------------|----------------------------------------------------------------------------------------------------------------------------------------------------------------------------|--------------------------------------------------------------------------------------------------------------------------------------------------------------------------------|
| Frozen        |                                                                                           |                                                                                             |
| Thawed (24 h) | <br>   | <br>   |
| Thawed (48 h) | <br> | <br> |
| Thawed (72 h) | <br> | <br> |

Table S4. Gas composition (O<sub>2</sub> and CO<sub>2</sub>) throughout the shelf-life of whole and cut strawberries.

|         | O <sub>2</sub> (%)  |               |              |
|---------|---------------------|---------------|--------------|
|         | 4 d                 | 7 d           | 11 d         |
| W-CON   | 14.1 ± 1.0 a        | 12.3 ± 0.2 ab | 10.6 ± 1.7 b |
| W-TREAT | 12.8 ± 1.1a         | 12.7 ± 0.5a   | 10.8 ± 1.3 a |
| C-CON   | 12.7 ± 1.1a         | 12.9 ± 0.7 a  | 12.2 ± 0.4 a |
| C-TREAT | 12.2 ± 0.2a         | 12.3 ± 1.0 a  | 10.9 ± 0.6 b |
|         | CO <sub>2</sub> (%) |               |              |
|         | 4 d                 | 7 d           | 11 d         |
| W-CON   | 8.3 ± 1.1 b         | 10.5 ± 0.3 ab | 13.1 ± 2.4 a |
| W-TREAT | 9.8 ± 1.3a          | 9.9 ± 0.7 a   | 12.5 ± 1.9 a |
| C-CON   | 9.9 ± 1.3a          | 10.0 ± 0.9 a  | 11.1 ± 0.4 a |
| C-TREAT | 10.3 ± 0.4 b        | 10.6 ± 1.3 b  | 12.5 ± 0.8 a |

Table S5. Average respiration rate (RR) of different strawberry formats (whole and fresh-cut) throughout the shelf-life (11 d).

|         | O <sub>2</sub> | CO <sub>2</sub> | RR       |
|---------|----------------|-----------------|----------|
| W-CON   | 26.7 ± 0.4     | 7.2 ± 0.7       | Moderate |
| W-TREAT | 27.4 ± 0.2     | 8.0 ± 0.5       | Moderate |
| C-CON   | 26.6 ± 0.2     | 7.4 ± 0.6       | Moderate |
| C-TREAT | 26.3 ± 0.2     | 7.8 ± 0.1       | Moderate |

Table S6. Weight loss of the different strawberry formats (whole and cut) throughout the shelf-life of the product.

|         | <b>4 d</b>      | <b>7 d</b>     | <b>11 d</b>    |
|---------|-----------------|----------------|----------------|
| W-CON   | 1.70 ± 0.14 aA  | 3.02 ± 0.52 aB | 3.15 ± 0.15 aB |
| W-TREAT | 2.59 ± 0.26 bA  | 2.45 ± 0.52 aA | 2.82 ± 0.33 aA |
| C-CON   | 2.35 ± 0.56 abA | 2.31 ± 0.02 aA | 2.51 ± 0.20 aA |
| C-TREAT | 2.37 ± 0.16 abA | 2.35 ± 0.15 aA | 3.16 ± 0.32 aB |
